# Supplementary material for: Completion Rate and Positive Results Reporting Among Immunotherapy Trials in Breast Cancer, 2004-2023
Source: PubMed Central journal article supplement (PMC11259908; doi:10.1001/jamanetworkopen.2024.23390), 2024-07-19
Supplement: jamanetwopen-e2423390-s001.pdf [file jamanetwopen-e2423390-s001.pdf]

# Supplemental Online Content

Mariani M, Viale G, Galbardi B, et al. Completion rate and positive results reporting among immunotherapy trials in breast cancer, 2004-2023. *JAMA Netw Open*. 2024;7(7):e2423390. doi:10.1001/jamanetworkopen.2024.23390

## **Supplement 1. eFigure.** Flowchart of Methods

This supplemental material has been provided by the authors to give readers additional information about their work.

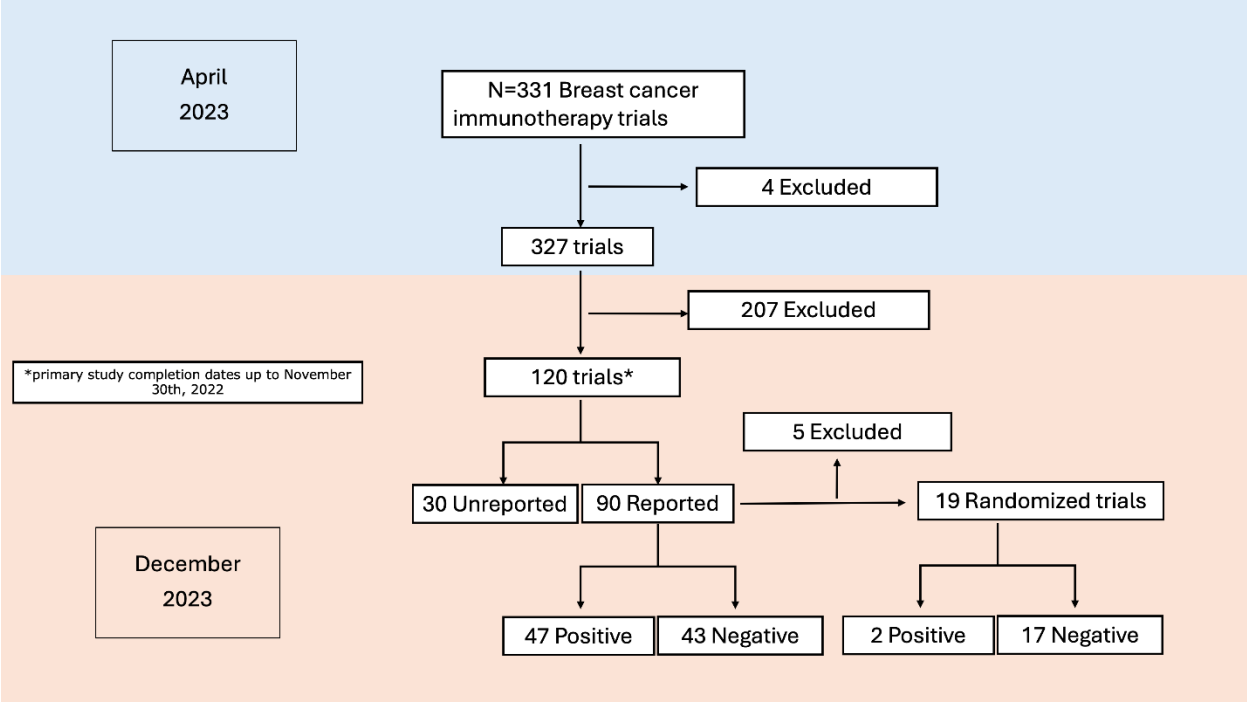

eFigure. Flowchart of Methods
