# Supplementary material for: Completion Rate and Positive Results Reporting Among Immunotherapy Trials in Breast Cancer, 2004-2023
Source: PubMed Central journal article supplement (PMC11259908; doi:10.1001/jamanetworkopen.2024.23390), 2024-07-19
Supplement: jamanetwopen-e2423390-s003.pdf [file jamanetwopen-e2423390-s003.pdf]

## Data Sharing Statement

Mariani. Completion Rate and Positive Results Reporting Among Immunotherapy Trials in Breast Cancer, 2004-2023. *JAMA Netw Open*. Published July 19, 2024.  
doi:10.1001/jamanetworkopen.2024.23390

### Data

**Data available:** Yes

**Data types:** Other (please specify)

**Additional Information:** publicly available data from clinicaltrial.gov

**How to access data:** <https://clinicaltrials.gov>

**When available:** With publication

### Supporting Documents

**Document types:** Other (please specify)

**Additional Information:** excel file

**How to access documents:** excel file

**When available:** With publication

### Additional Information

**Who can access the data:** anyone

**Types of analyses:** any purpose

**Mechanisms of data availability:** publicly available
